# Supplementary material for: Click chemistry-based core–shell molecularly imprinted polymers for the determination of pyrimethamine in fish and plasma samples
Source: Royal Society of Chemistry journal article supplement (doi:10.1039/c8ay00876k), 2018-01-01
Supplement: c8ay00876k1.pdf [file c8ay00876k1.pdf]

## Click chemistry-based core-shell molecularly imprinted polymers for the determination of pyrimethamine in fish and plasma samples

Shuyi Huang,<sup>a</sup> Manli Guo,<sup>a</sup> Lei Tan,<sup>\*b</sup> Jiean Tan,<sup>a</sup> Jinyi Wu,<sup>a</sup> Youwen Tang,<sup>a</sup> Yong Liang<sup>\*a</sup>

Received (in XXX, XXX) Xth XXXXXXXXXX 20XX, Accepted Xth XXXXXXXXXX 20XX

DOI: 10.1039/b000000x

<sup>a</sup> School of Chemistry and Environment, South China Normal University, Guangzhou, 510006, China. Fax: +86-020-36545137; Tel: +86-020-36545121; E-mail: liangy@scnu.edu.cn

<sup>b</sup> Guangzhou Center for Disease Control and Prevention, Guangzhou, 510440, China. Fax: +86-020-36545137; Tel: +86-020-36545121; E-mail: jsutanlei@gmail.com

**Table S1** Comparison of the proposed method with other established methods for the determination of pyrimethamine.

|                             | Method        | Sample preparation                | Linear range        | LOD         | Ref. |
|-----------------------------|---------------|-----------------------------------|---------------------|-------------|------|
| Plasma                      | HPLC-MS       | protein precipitation             | 0.02–5 µg/mL        | nd          | 1    |
| Plasma                      | HPLC-MS       | protein precipitation             | 0.01-1.0 µg/mL      | 0.5 ng/mL   | 2    |
| plasma                      | HPLC-MS/MS    | liquid-liquid extraction          | 0.78-400 ng/mL      | 0.39 ng/mL  | 3    |
| Plasma                      | HPLC-MS       | liquid-liquid extraction          | 5-30 ng/mL          | 1.12 ng/mL  | 4    |
| Milk                        | HPLC-MS/MS    | solid-phase extraction            | 1.0-300 ng/mL       | 0.51 ng/mL  | 5    |
| Milk                        | HPLC-MS       | solid-phase extraction            | nd                  | 0.5 ng/mL   | 6    |
| Formulations                | HPLC          | Filtration                        | 0.2 -4 µg/mL        | 60 µg/L     | 7    |
| Pharmaceutical formulations | RP-HPLC       | Dilution                          | 0.5-3.0 mg/L        | 0.01µg/mL   | 8    |
| Pharmaceutical formulations | UV            | complexation reaction             | 0-100 mg/L          | 5 µg/mL     | 9    |
| equipment surfaces          | HPLC          | Dilution                          | 0.129-4.02<br>µg/mL | 0.042 µg/mL | 10   |
| feeds                       | HPLC          | liquid-liquid extraction          | 2-5 µg/g            | nd          | 11   |
| Animal tissue/egg           | HPLC          | liquid-liquid extraction          | 0.01-1 µg/kg        | 10 ng/g     | 12   |
| Whole blood                 | HPLC          | solid-phase extraction            | 1-10 µg/mL          | 0.6 µg/mL   | 13   |
| Serum and Urine             | Acoustic wave | Molecularly imprinted<br>polymers | 14.9-24.87 mg/L     | 4.96 mg/L   | 14   |
| Fish muscles                | HPLC          | liquid-liquid extraction          | 0-0.05 µg/g         | 0.005 mg/kg | 15   |
| Fish/plasma/urine           | HPLC          | Molecularly imprinted             |                     |             | This |

1. J. K. Johannessen, I. Christiansen, D. R. Schmidt, E. Petersen, S.H. Hansen, Simultaneous determination of pyrimethamine, sulfadiazine and N-acetyl-sulfadiazine in plasma for monitoring infants in treatment of congenital toxoplasmosis, *Journal of Pharmaceutical and Biomedical Analysis*, 2005, 36, 1093-1098.
2. B. A. Sinnaeve, T. N. Decaestecker, P. G. Risha, J. P. Remon, C. Vervaet, J. F. V. Bocxlaer, Liquid chromatographic–mass spectrometric assay for simultaneous pyrimethamine and sulfadoxine determination in human plasma samples, *Journal of Chromatography A*, 2005, 1076, 97–102.
3. S. Sabarinath, R. P. Singh, R. C. Gupta, Simultaneous quantification of  $\alpha$ -/ $\beta$ -diastereomers of arteether, sulphadoxine and pyrimethamine: A promising anti-relapse antimalarial therapeutic combination, by liquid chromatography tandem mass spectrometry, *Journal of Chromatography B*, 2006, 842, 36–42.
4. M. Sandhya, P. S. Shijikumar, A simplified liquid chromatography-mass spectrometry method for simultaneous determination of pyrimethamine, sulphadoxine and artesunate in human plasma, *Journal of Applied Pharmaceutical Science*, 2015, 5, 109-114.
5. U. Koesukwiwat, S. Jayanta, N. Leepipatpiboon, Validation of a liquid chromatography–mass spectrometry multi-residue method for the simultaneous determination of sulfonamides, tetracyclines, and pyrimethamine in milk, *Journal of Chromatography A*, 2007, 1140, 147–156.
6. U. Koesukwiwat, S. Jayanta, N. Leepipatpiboon, Solid-phase extraction for multiresidue determination of sulfonamides, tetracyclines, and pyrimethamine in Bovine's milk, *Journal of Chromatography A*, 2007, 1149, 102–111.
7. J. J. Berzas Nevado, G. Castaneda Penalvo, F. J. Guzman Bernardo, Simultaneous determination of sulfaquinoxaline, sulfamethazine and pyrimethamine by liquid chromatography, *Journal of Chromatography A*, 2000, 870, 169–177.
8. M. S. Arayne, N. Sultana, F. A. Siddiqui, S. Naseem, F. Qureshi, Simultaneous determination of pyrimethamine, sulfadoxine, mefloquine, and ibuprofen in pharmaceutical formulations by RP-HPLC, *Medicinal Chemistry Research*, 2010, 19, 1043–1054.
9. J. O. Onah, J. E. Odeiani, Simultaneous spectrophotometric determination of sulfadoxine and pyrimethamine in pharmaceutical formulations, *Journal of Pharmaceutical and Biomedical Analysis*, 2002, 30, 851–857.
10. M. B. Bocaa, Z. Apostolides, E. Pretorius, A validated HPLC method for determining residues of a dual active ingredient anti-malarial drug on

manufacturing equipment surfaces, *Journal of Pharmaceutical and Biomedical Analysis* 2005, 37, 461–468.

11. P. S. Gong, S. L. Jeng, Y. F. Hsu, C. C. Lin, S. Y. Lin, Development of a method for the determination of pyrimethamine concentrations in feeds by ion-pairing

high-performance liquid chromatography, *Journal of Food Protection*, 2002, 65, 688–691.

12. S. Horii, M. Nishi, N. Oku, H. Miyakawa, M. Tezuka, Determination of pyrimethamine in animal tissue and egg by liquid chromatography with fluorescence detection, *Journal of Aoac International* 2001, 84, 1031-1034.

13. M. D. Green, D. L. Mount, H. Nettey, High-performance liquid chromatographic assay for the simultaneous determination of sulfadoxine and pyrimethamine from whole blood dried onto filter paper, *Journal of Chromatography B*, 2002, 767, 159–162.

14. H. Peng, C. Liang, D. He, L. Nie, S. Yao, Bulk acoustic wave sensor using molecularly imprinted polymers as recognition elements for the determination of pyrimethamine, *Talanta*, 2000, 52, 441–448.

15. G. P. Qian, J. Z. Yu, Determination of pyrimethamine in fish muscles using high performance liquid chromatography, *Chinese Journal of Health Laboratory Technology* 2005, 15, 697-698.
